302 Found

# Found

The document has moved here.

---

Apache Server at www.ploscompbiol.org Port 80
